# Supplementary material for: Using a combined power law and log-normal distribution model to simulate particle formation and growth in a mobile aerosol chamber
Source: Copernicus journal article supplement (doi:10.5194/acp-16-7067-2016), 2016-06-10
Supplement: Supplementary file 1 [file acp-16-7067-2016-supplement.zip]

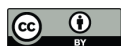

## *Supplement of*

# **Using a combined power law and log-normal distribution model to simulate particle formation and growth in a mobile aerosol chamber**

**Miska Olin et al.**

*Correspondence to:* Miska Olin ([miska.olin@tut.fi](mailto:miska.olin@tut.fi))

- [acp-16-7067-2016-supplement-title-page.pdf](#)
- [supplement video.mp4](#)

The copyright of individual parts of the supplement might differ from the CC-BY 3.0 licence.
